# Supplementary material
Source: publisher figshare collection journal article supplement (https://sage.figshare.com/ndownloader/files/17763248)

**Appendix 1: Measurement of kidney dimensions from computed tomography scan from axial image for transverse and anteroposterior measurements (left) and sagittal image for length (right)**

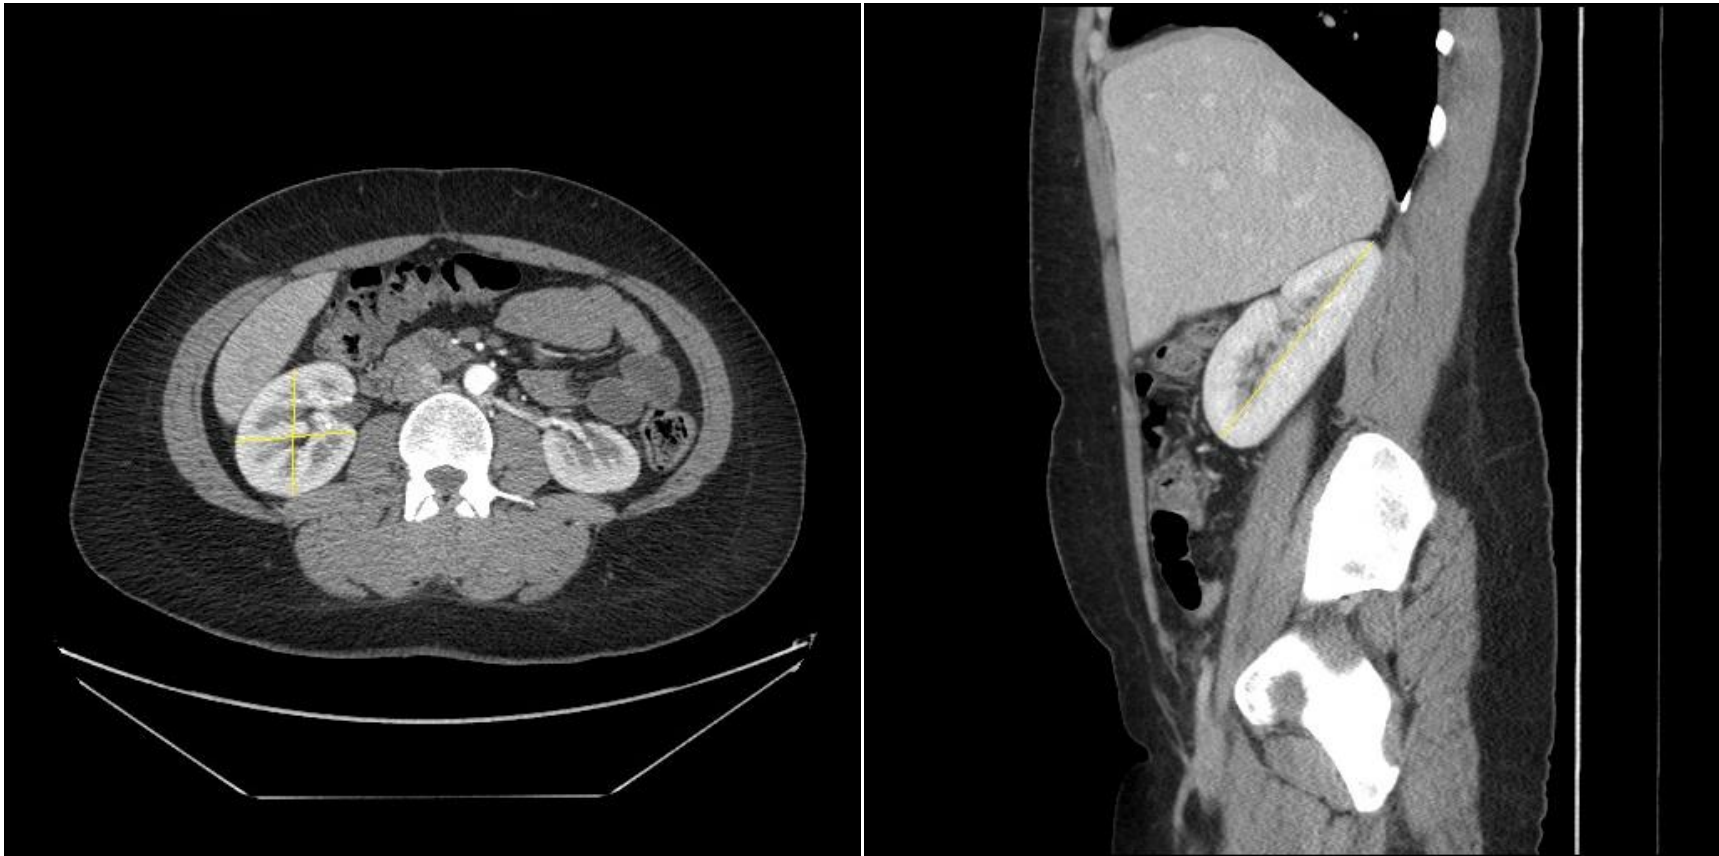

Supplement: Supplementary file 1 [file 17763248]
